# Supplementary material
Source: PubMed Central journal article supplement (PMC2268183)
Supplement: supp_0712085105_12085Fig8.pdf [file supp_0712085105_12085Fig8.pdf]

# TFBS over-representation heatmap

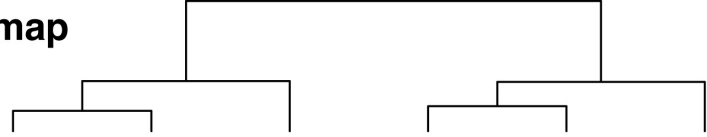

Agamous NR3C1 SRF  
 NR1H2-RXRA NR3C1 RREB1 Klf4  
 NR1H2-RXRA NR3C1 RREB1 Klf4 RORA\_Myt  
 Ddit3-Cebpa TGA1 Gata1 ETS1 Pax6  
 Hand1-Tcfe2a ELF5 Pax6  
 PPARG-RXRA E2F1 IRF2  
 GMYB NR2F1 NFYA  
 TLX1-NFIC BRAC1 Bapx1  
 GABPA HNF4A TEAD REST Pax2 dl\_1  
 RXRA-VDR ELK4 MIZF Spz1  
 bZIP910 RELA ELK1 Eip74EF PBF RORA\_1  
 MNB1 PBX1 Dof3 Dof2 En1  
 RUNX1 HMG-1 IRF1 Fos STAT1  
 TCF11-MafG TAL1-TCF3 ovo Pax4 Evi1 id1  
 MEF2A GATA2 ARR10 AGL3 SOX9 HLF Gfi  
 FOXC1 Cebpa Sox17 HLF FOXF2  
 Broad-complex\_1 ATHB5 HNF1A PEND Sox5 NFIL3  
 MYB.ph3 NKX3-1 SPIB Lhx3 FOXD1  
 RUSH1-alfa CF2-II Athb-1 TBP  
 Broad-complex\_4 Nobox Foxa2 SRY hb  
 Broad-complex\_3 Broad-complex\_2 SQUA Lhx3 Foxd3 FOXI1  
 MZF1\_5-13 PPARG FOXL1 Prrx2 Roaz Ubx  
 Arnt-Ahr NFkB1 ESR1 ZEB1 Pax5 usp  
 ZNF354 Mafb DI\_2 SP11 sna REL  
 MYC-MAX NF-kappaB NHLH1 USF1 Mycn MAX Arnt  
 Macho-1 bZIP911 EMBP1 CREB1 MZF1\_1-4 MAX Arnt  
 TFAP2A MZF1\_1-4 ABI4 SP1

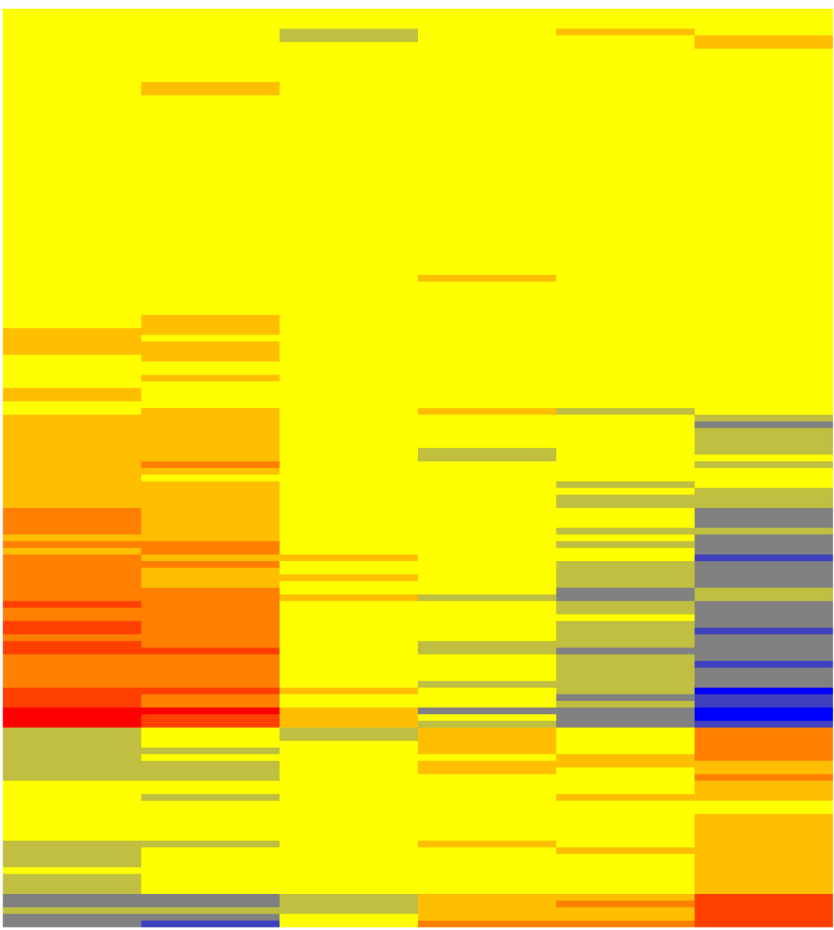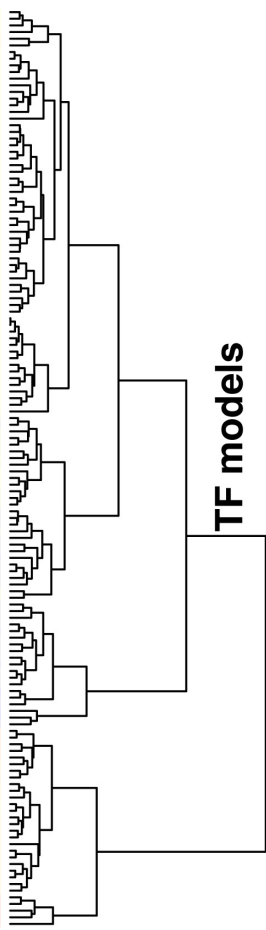

TF models

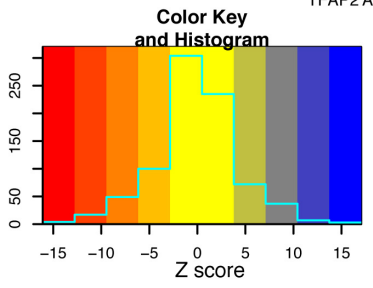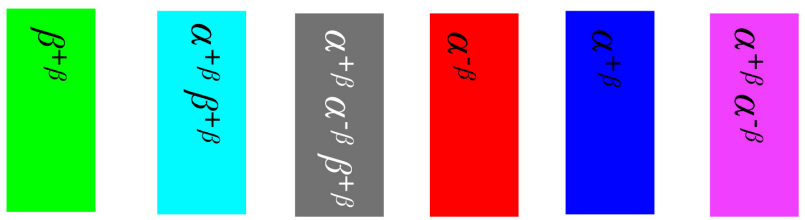

Dataset
