# Supplementary material
Source: PubMed Central journal article supplement (PMC2268183)

Distance to closest TSS, cumulative

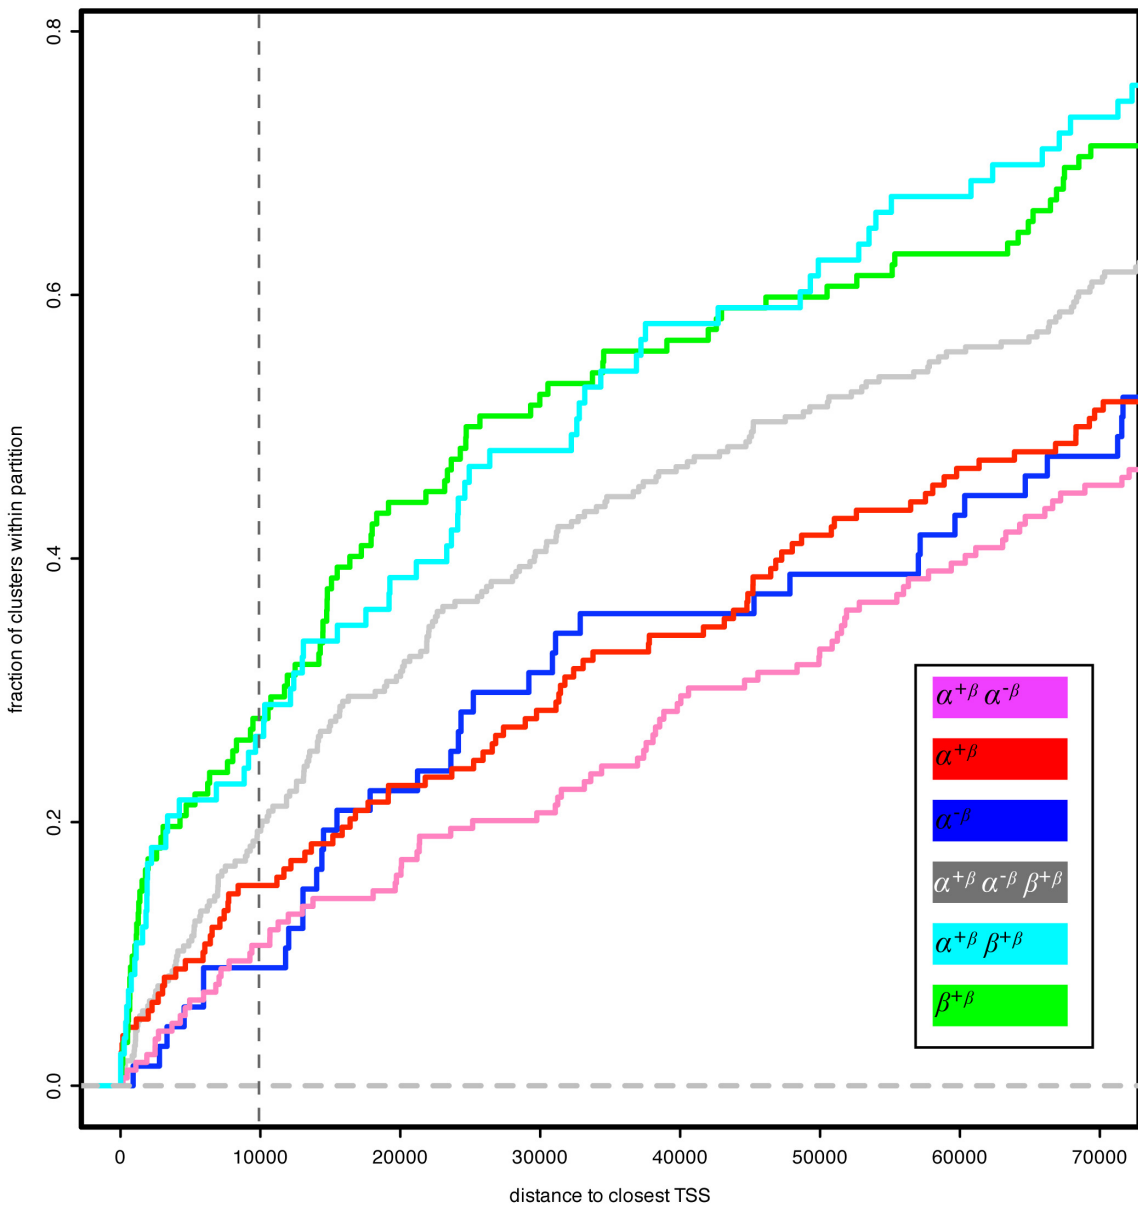

Supplement: supp_0712085105_12085Fig10.pdf [file supp_0712085105_12085Fig10.pdf]

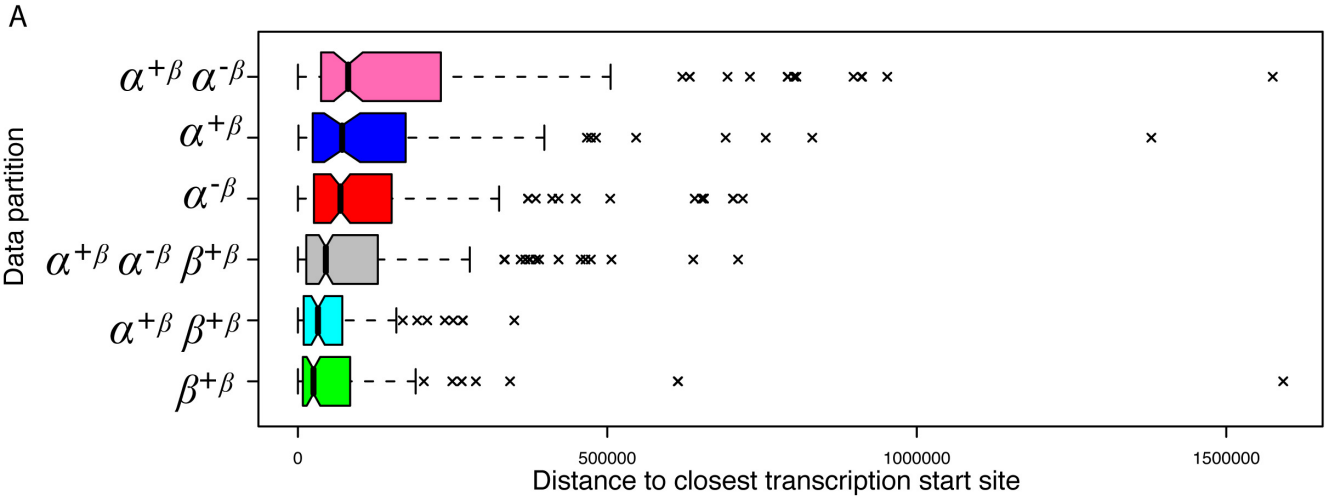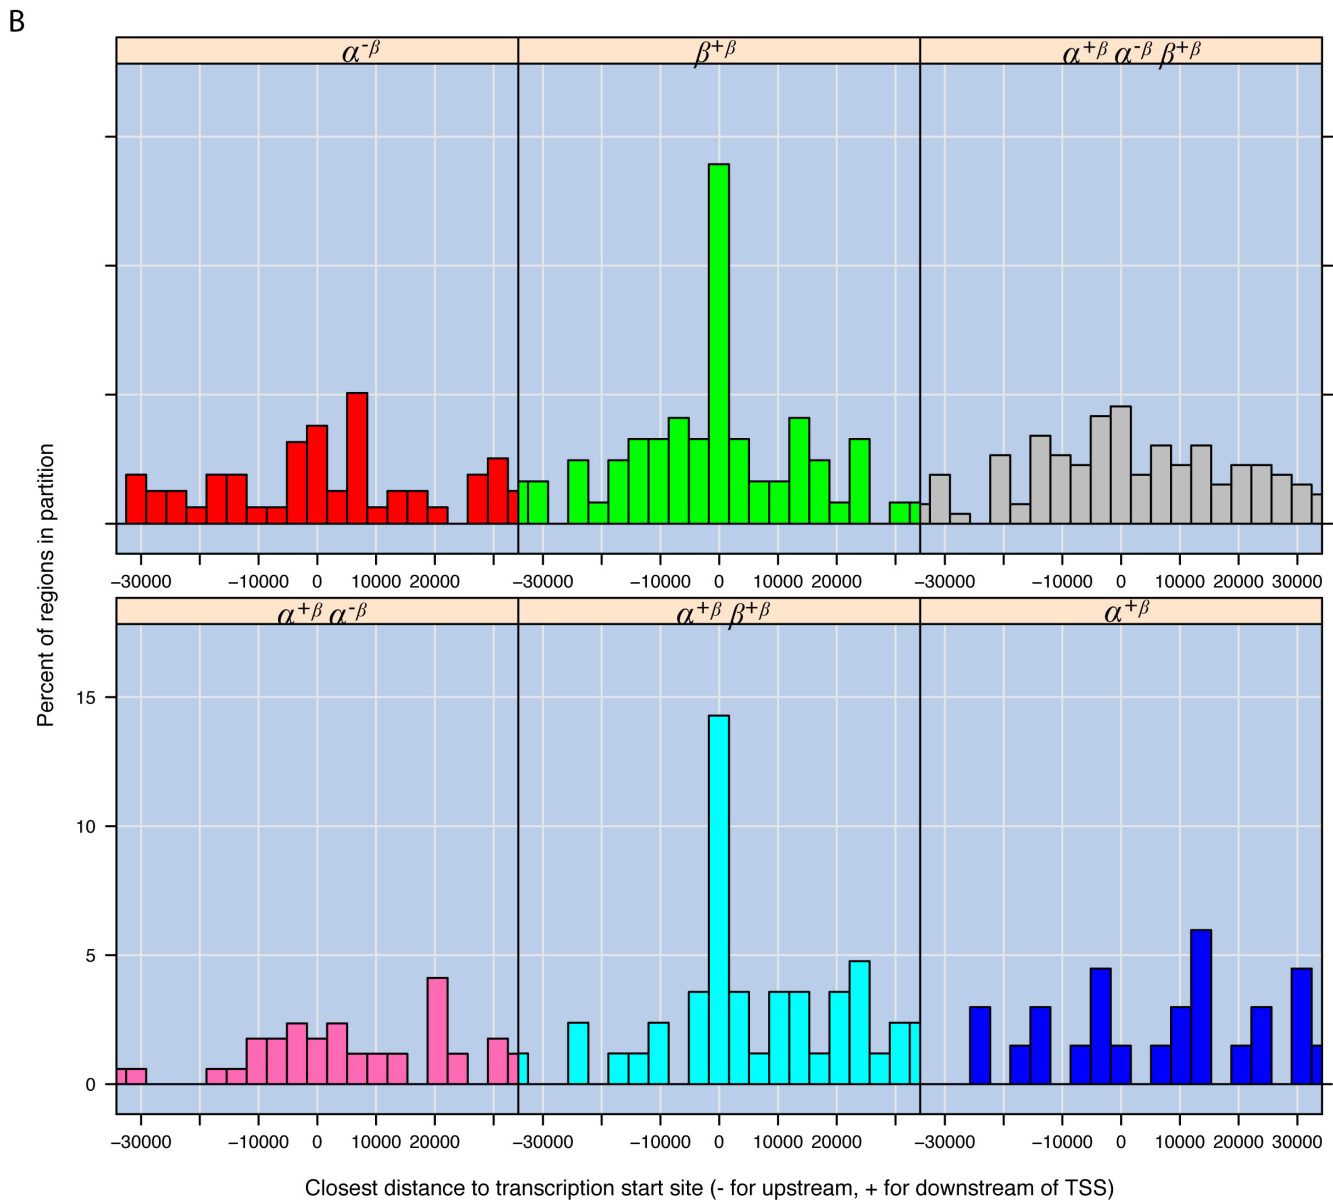

Supplement: supp_0712085105_12085Fig9.pdf [file supp_0712085105_12085Fig9.pdf]
